# Supplementary material
Source: Elsevier journal article supplement (https://www.sciencedirect.com/science/article/pii/S0021755716302923)

## Supplementary Material

**Table 1S.** Sample number and the corresponding time of collection.

| Sample | Time point |
|--------|------------|
| 1      | 2 days     |
| 2      | 7 days     |
| 3      | 1 month    |
| 4      | 2 months   |
| 5      | 3 months   |
| 6      | 4 months   |
| 7      | 5 months   |
| 8      | 6 months   |
| 9      | 7 months   |
| 10     | 8 months   |
| 11     | 9 months   |
| 12     | 10 months  |
| 13     | 11 months  |
| 14     | 12 months  |
| 15     | 13 months  |
| 16     | 14 months  |
| 17     | 15 months  |
| 18     | 16 months  |

**Figure 1S - Dendrogram distance from the profile strips of children's stool samples.**

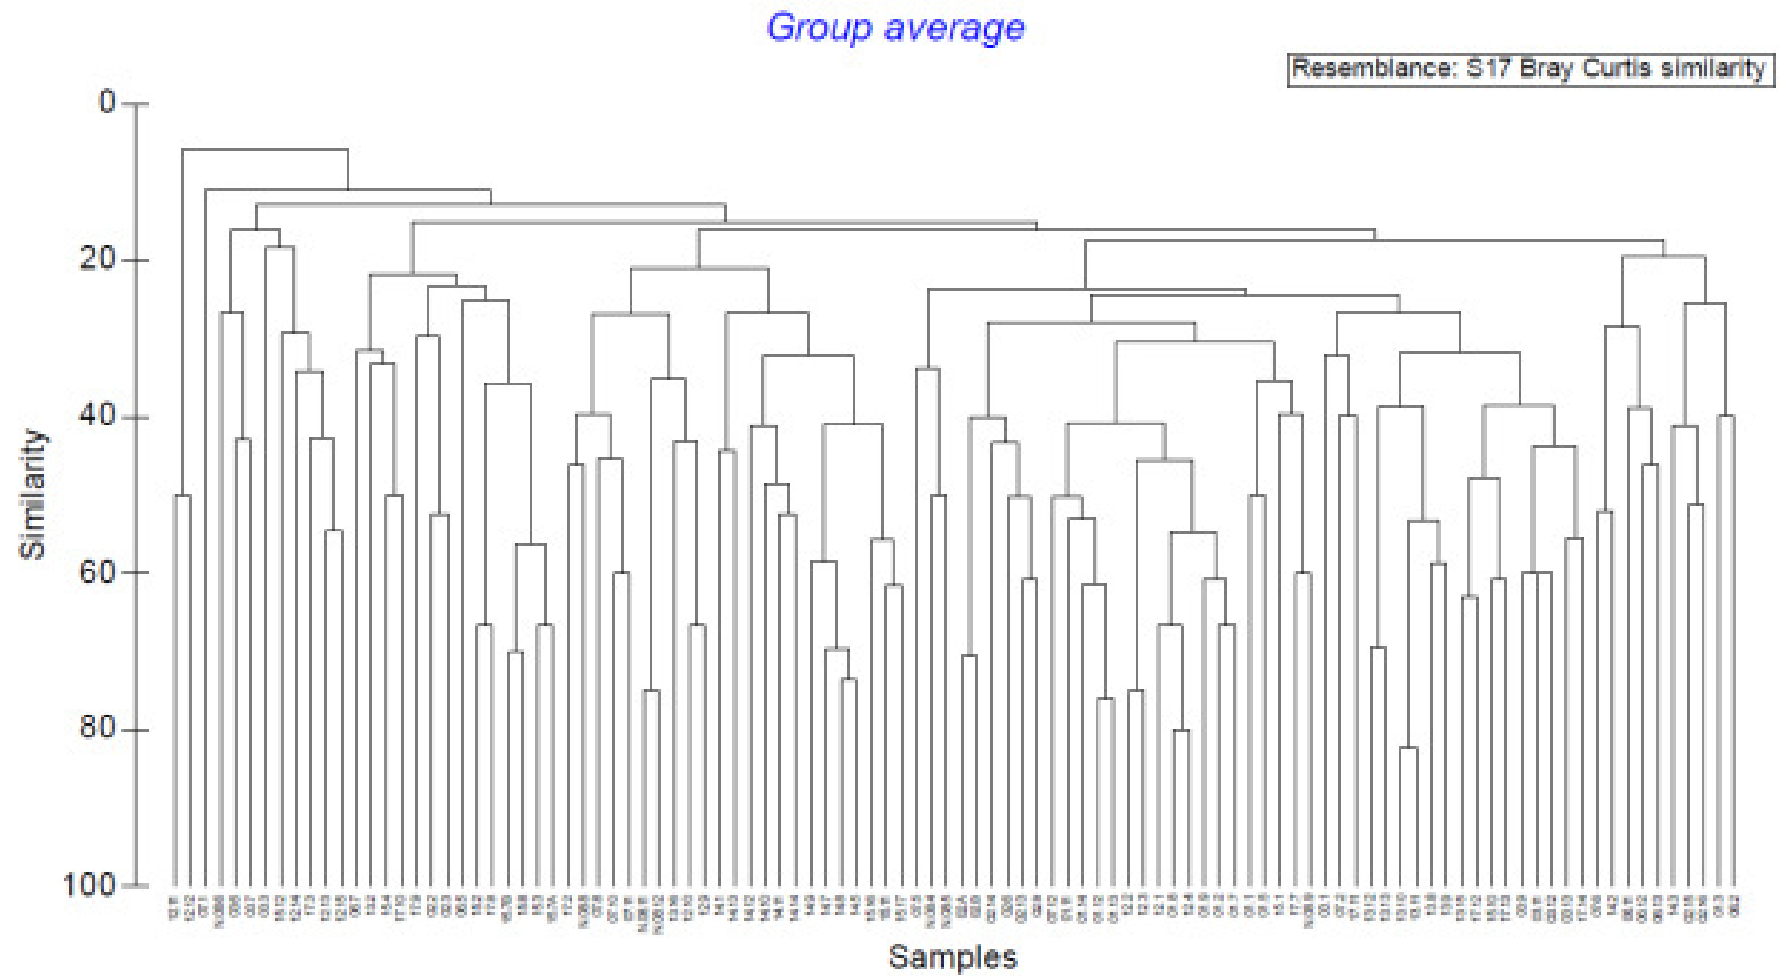

Supplement: mmc1 [file S0021755716302923:mmc1.pdf]
