# Supplementary material
Source: Elsevier journal article supplement (https://www.sciencedirect.com/science/article/pii/S0021755716302923)

## Supplementary Material

**Table 1S.** Sample number and the corresponding time of collection.

| <b>Sample</b> | <b>Time point</b> |
|---------------|-------------------|
| 1             | 2 days            |
| 2             | 7 days            |
| 3             | 1 month           |
| 4             | 2 months          |
| 5             | 3 months          |
| 6             | 4 months          |
| 7             | 5 months          |
| 8             | 6 months          |
| 9             | 7 months          |
| 10            | 8 months          |
| 11            | 9 months          |
| 12            | 10 months         |
| 13            | 11 months         |
| 14            | 12 months         |
| 15            | 13 months         |
| 16            | 14 months         |
| 17            | 15 months         |
| 18            | 16 months         |

Figure 1S - Dendrogram distance from the profile strips of children's stool samples.

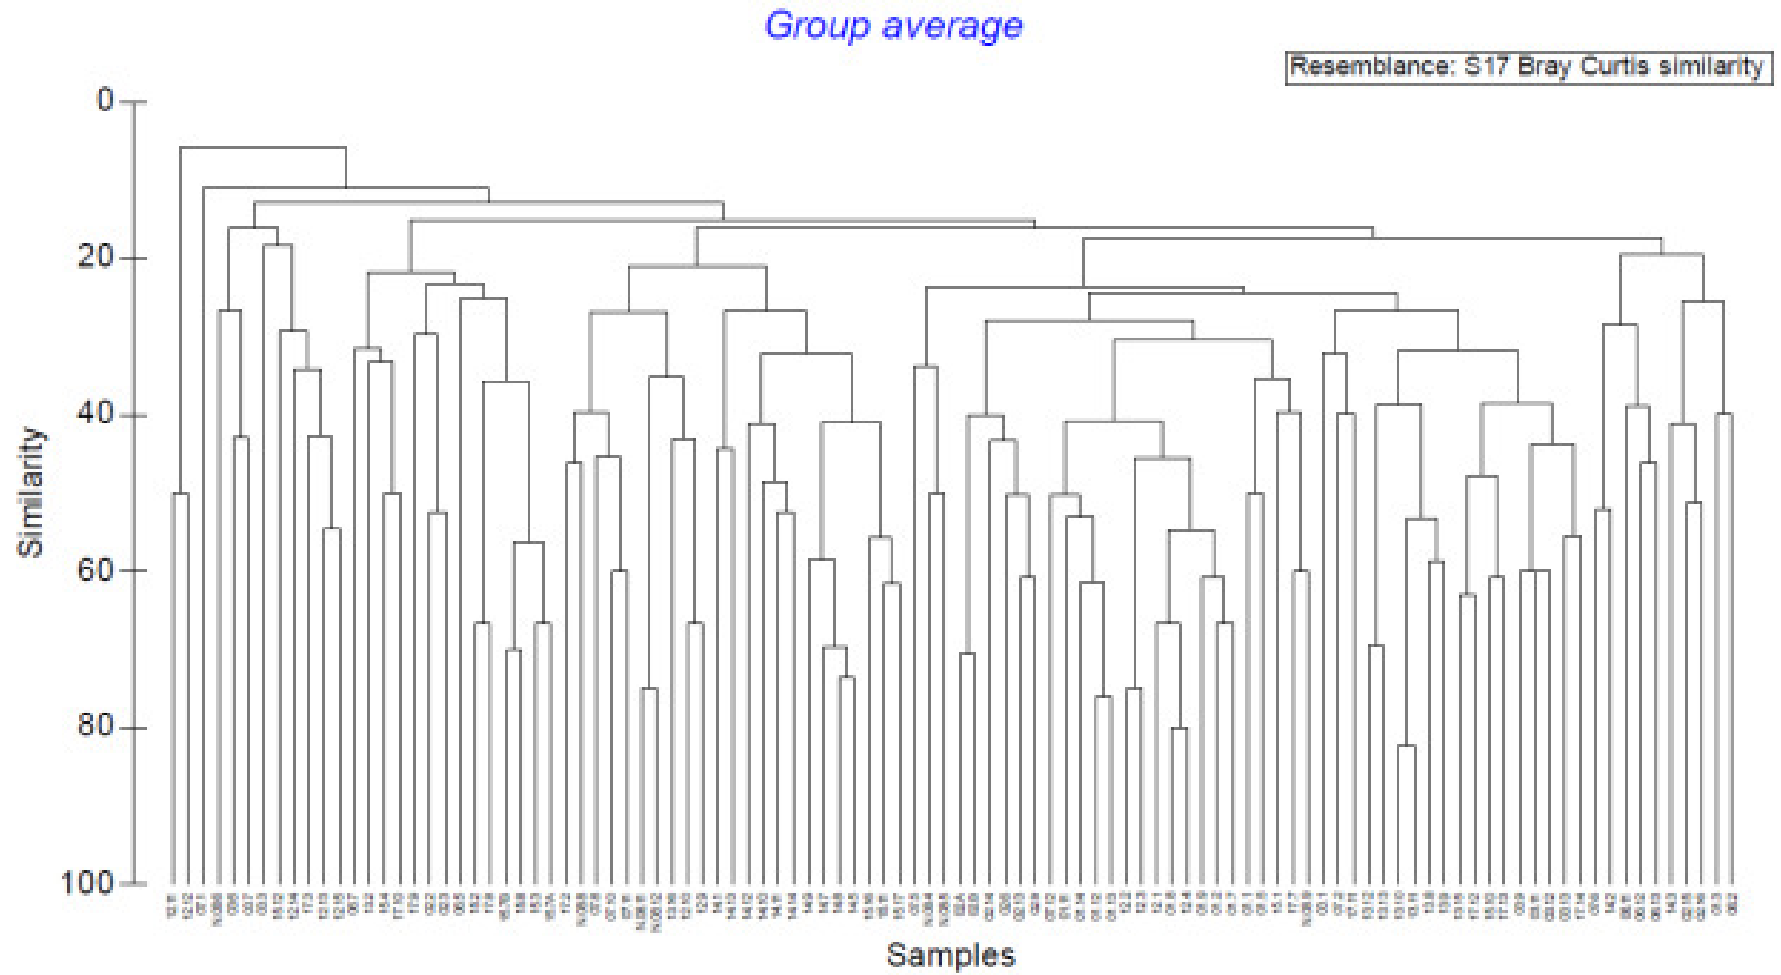

Supplement: mmc1 [file S0021755716302923:mmc1.pdf]
